1   **(1) Title of the paper**

2   Marker-assisted selection of trees with *MALE STERALITY 1* in *Cryptomeria japonica* D.

3   Don

4

5   **(2) Names and affiliations of the authors**

6   **Yoshinari Moriguchi<sup>1</sup>, Saneyoshi Ueno<sup>2</sup>, Yoichi Hasegawa<sup>2</sup>, Takumi Tadama<sup>1</sup>,**

7   **Masahiro Watanabe<sup>1</sup>, Ryunosuke Saito<sup>1</sup>, Satoko Hirayama<sup>3</sup>, Junji Iwai<sup>4</sup>, Yukinori**

8   **Konno<sup>5</sup>**

9

10   <sup>1</sup> Graduate School of Science and Technology, Niigata University, 8050, Igarashi  
11    2-Nocho, Nishi-ku Niigata 950-2181, Japan.

12   <sup>2</sup> Department of Forest Genetics, Forestry and Forest Products Research Institute, 1  
13    Matsunosato, Tsukuba, Ibaraki 305-8687, Japan.

14   <sup>3</sup> Niigata Prefecture Niigata Regional Promotion Bureau, 2009 Akiha-ku Hodojima,  
15    Niigata 956-8635, Japan.

16   <sup>4</sup> Niigata Prefectural Forest Research Institute, 2249-5 Unotoro, Murakami, Niigata  
17    958-0264, Japan.

18   <sup>5</sup> Miyagi Prefectural Forest Research Institute, 3-8-1 Aoba-ku Honmachi, Sendai  
19    980-8570, Japan.

20

21   **(3) Name and address of the corresponding author**

22   Yoshinari Moriguchi

23   Phone: +81-25-262-6861

24   E-mail: [chimori@agr.niigata-u.ac.jp](mailto:chimori@agr.niigata-u.ac.jp)

25

26 **Abstract**

27 Practical use of marker-assisted selection (MAS) is limited in conifers because  
28 of the difficulty with developing markers due to a rapid decrease in linkage  
29 disequilibrium, the limited genomic information available, and the diverse genetic  
30 backgrounds among breeding material collections. First, in this study, two families were  
31 produced by artificial crossing between two male-sterile trees, Shindai11 and Shindai12,  
32 and a plus tree, Suzu-2 (*Ms1/ms1*) (S11-S and S12-S families, respectively). The  
33 segregation ratio between male-sterile and male-fertile trees did not deviate significantly  
34 from the expected 1:1 ratio in either family. These results clearly suggested that the  
35 male-sterile gene of Shindai11 and Shindai12 is *MALE STERALITY 1 (MS1)*. Because  
36 some markers reported previously have not been linkage mapped, we constructed a  
37 partial linkage map of the region encompassing *MS1* using the S11-S and S12-S  
38 families. For the S11-S and S12-S families, 19 and 18 markers were mapped onto the  
39 partial linkage maps of *MS1* region, respectively. There was collinearity (conserved  
40 gene order) between the two partial linkage maps. Two markers (CJt020762\_*ms1-1* and  
41 reCj19250\_2335) were mapped to the same position as the *MS1* locus on both maps. Of  
42 these markers, we used CJt020762 for MAS in this study. According to the MAS results  
43 for 650 trees from six prefectures of Japan (603 trees from breeding materials and 47  
44 trees from the Ishinomaki natural population), five trees in Niigata Prefecture and one  
45 tree in Yamagata Prefecture had heterozygous *ms1-1*, and three trees in Miyagi  
46 Prefecture had heterozygous *ms1-2*. The results obtained in this study suggested that  
47 there may be geographical hotspots for the *ms1-1* and *ms1-2* alleles. Because MAS can  
48 be used effectively to reduce the labor and time required for selection of trees with a  
49 male-sterile gene, the number of breeding materials should increase in the future.

50

51 **Keywords** conifer, linkage map, male sterility, marker-assisted selection

52

## 53 **Introduction**

54 Molecular marker-assisted selection (MAS), which can reduce the time  
55 required for a breeding cycle, is an attractive method for conifers, which have longer  
56 generation times than those of most crop species [1]. However, in conifers, practical use  
57 of MAS is limited because it is difficult to develop markers for MAS due to a rapid  
58 decrease in linkage disequilibrium, the limited genomic information available, and the  
59 diverse genetic backgrounds among breeding material collections. Nevertheless, the  
60 progress with genome analysis technologies has recently accelerated, producing an  
61 enormous volume of sequences and subsequent development of markers linked to a  
62 particular target gene.

63 Sugi (*Cryptomeria japonica* D. Don) is an important forestry species that  
64 occupies nearly 4.5 million hectares of artificial forest in Japan, which corresponds to  
65 approximately 44% of all artificial forest area in the country [2]. The forestry-related  
66 increase in the area covered by *C. japonica* has triggered pollinosis. *C. japonica*  
67 pollinosis is one of the most serious allergies in Japan, affecting 26.5% of the Japanese  
68 population [3]. As a countermeasure against *C. japonica* pollinosis, male-sterile trees  
69 can be implemented effectively. The first *C. japonica* tree with genetic male sterility  
70 conferred by a major recessive gene, *MALE STERILITY 1 (MS1)*, was found in Toyama  
71 Prefecture in 1992 (Toyama-1) [4, 5, 6]. Since the discovery of this individual, six  
72 male-sterile trees homozygous for *MS1 (ms1/ms1)* have been selected (Shindai3,  
73 Fukushima1, Fukushima2, Tahara-1, Sosyun, and Miefunen-1) [7, 8, 9, 10, 11, 6, 12].  
74 The frequency of these male-sterile trees in the forest is considered to be very low,  
75 because Igarashi et al. [7] identified only two male-sterile trees in a screening of 8,700

76 trees distributed across a 19-ha artificial forest. Male-sterile trees are generally  
77 identified by observing pollen release and/or by direct inspection of the male strobili  
78 using a magnifying glass or microscope. In the selected male-sterile trees, confirmation  
79 of the male-sterile gene *MS1* was made based on the results of test crossings. These test  
80 crossings led to the discovery of three other male-sterile genes: *MS2*, *MS3*, and *MS4* [5,  
81 13, 14, 6]. In some male-sterile trees such as Shindai11 and Shindai12, male-sterile  
82 genes have not yet been investigated.

83           Mutations in the *MS1* gene leads to the collapse of microspores after separation  
84 of pollen tetrads [15], whereas that of the *MS2* gene leads to the formation of  
85 microspore clumps after normal microsporogenesis [13]. On the other hand, mutations  
86 in the *MS3* and *MS4* genes lead to the formation of microspores of various sizes after  
87 normal microsporogenesis [13, 14]. The four male-sterile genes *MS1*, *MS2*, *MS3*, and  
88 *MS4* have been mapped to different linkage groups: the ninth (referred to as LG9  
89 hereafter), fifth, first, and fourth linkage groups, respectively [15, 16, 17]. Only one tree  
90 with *ms2*, *ms3*, and *ms4* was selected, respectively. Therefore, trees with *ms1* have  
91 generally been used for tree improvement and seedling production. Both male-sterile  
92 trees and also trees heterozygous for the male-sterile gene are important for tree  
93 improvement and seed production as the maternal and paternal parents, respectively.  
94 Currently, seven trees heterozygous for *MS1* (*Ms1/ms1*), Suzu-2, Naka-4, Ooi-7,  
95 Ohara-13, Zasshunbo, Kamiukena-16, and Kurihara-4, have been selected [4, 6, 19, 20,  
96 12; Konno, personal communication]. For precise selection of trees heterozygous for  
97 *MS1*, it is generally necessary to produce F<sub>1</sub> trees by artificial crossing and to confirm  
98 whether these F<sub>1</sub> trees are male-sterile or -fertile trees. Confirmation is performed by  
99 direct inspection of male strobili using a magnifying glass (or a microscope) or by  
100 observing pollen release.

101           Due to the large amount of labor required for selection, the number of trees  
102 with the male-sterile gene is not sufficient. To reduce the labor of screening, MAS of  
103 trees with the male-sterile gene is necessary. Recently, some markers closely linked to  
104 the *MSI* gene or derived from a putative *MSI* gene have been developed [18, 21, 22, 23].  
105 Moriguchi et al. [18] and Ueno et al. [23] reported that estSNP04188 and  
106 dDcontig\_3995-165 were 1.8 cM and 0.6 cM from *MSI* in the T5 family (173 trees),  
107 respectively. Hasegawa et al. [21] reported that 15 markers were 0 cM from *MSI* in the  
108 F107 family (84 trees). Among these, AX-174127446 showed a high rate of predicting  
109 trees with *msI*. Mishima et al. [22] reported two markers from contig “reCj19250” that  
110 can be used to select trees with *msI*. On the other hand, Hasegawa et al. [24] reported a  
111 candidate male-sterile gene CJt020762 at the *MSI* locus, and all breeding materials with  
112 the allele *msI* had either a 4-bp or 30-bp deletion in the gene (they defined these alleles  
113 as *msI-1* and *msI-2*, respectively). Both of these were expected to result in faulty gene  
114 transcription and function; therefore, they developed two markers [30] from contig  
115 “CJt020762”. Some of these markers have not been mapped on a linkage map. The lack  
116 of a linkage map for these markers constructed from the same family makes it difficult  
117 to understand the relative position of each marker.

118           Therefore, in this study, we (1) checked whether the male-sterile gene of  
119 Shindai11 and Shindai12 is *MSI* based on the results of test crossings, (2) constructed a  
120 partial linkage map of the region encompassing *MSI*, and (3) selected trees with *msI* by  
121 MAS. As there are few studies pertaining to practicable applications of MAS in conifers,  
122 this study should provide a valuable model.

123

## 124 **Materials and Methods**

### 125 **Phenotyping of male sterility and SNP genotyping for linkage analysis**

126 We used two families, S11-S and S12-S, in this study. These families were  
127 produced by artificial crossing between two male-sterile trees, Shindai11 and Shindai12,  
128 and a plus tree, Suzu-2 (*MsI/msI*), during March of 2016. Strobili production was  
129 promoted by spraying the trees with gibberellin-3 (100 ppm) in July 2018.  
130 Approximately five male strobili were sampled from each individual from early  
131 November to early December 2018. Each sampled male strobilus was bisected vertically  
132 with a razor, and male sterility was determined using a microscope (SZ-ST, Olympus,  
133 Tokyo, Japan). Individuals without male strobili and individuals in whom it was  
134 difficult to discriminate male sterility were excluded from further analysis. Finally, 130  
135 individuals from S11-S and 138 individuals from S12-S were used to construct a linkage  
136 map. Needle tissue was collected from three parent trees (Shindai11, Shindai12, and  
137 Suzu-2) and all F<sub>1</sub> trees (268 trees) of two mapping populations. Genomic DNA was  
138 extracted from these needles using a modified hexadecyltrimethylammonium bromide  
139 (CTAB) method [25, 30].

140 Single nucleotide polymorphism (SNP) markers from contigs “reCj19250” and  
141 “CJt020762” [22, 24] and SNP markers mapped to LG9 [26, 21, 23] were used to  
142 construct a partial linkage map of the region encompassing the *MSI* locus for each of  
143 the two families (because the gene is located in LG9) [16]. For estSNP00204 [18],  
144 AX-174127446 [21], and CJt020762 [24], the SNaPshot assay, which extends primers  
145 by a single base, was used for genotyping. The primer sequences used to target the three  
146 markers in the SNaPshot assay (estSNP00204 [18], AX-174127446 [21], and  
147 CJt020762 [24]) are shown in Table S1. Although CJt020762 contained a 4-bp and  
148 30-bp deletion, we used the 4-bp deletion for primer design because there is no  
149 polymorphism associated with the 30-bp deletion between parents of the mapping  
150 populations. Multiplex polymerase chain reaction (PCR) was performed using three

151 primer pairs and the Multiplex PCR Kit (QIAGEN, Hilden, Germany). Each reaction  
152 contained 2× QIAGEN multiplex PCR master mix, 1 μL primer mix (2.5 μM for each  
153 primer), and 40 ng genomic DNA in a total volume of 6 μL. Amplification was  
154 performed in the Takara PCR Thermal Cycler (Takara, Tokyo, Japan) using an initial  
155 denaturation step at 95 °C for 15 min, followed by 30 cycles of denaturation at 94 °C  
156 for 30 s, annealing at 57 °C for 1.5 min, and extension at 72 °C for 1 min, with a final  
157 extension at 60 °C for 30 min. To remove any primers and dNTPs, 5.0 μL of the PCR  
158 products were treated with 2.0 μL ExoSAP-IT reagent (Thermo Fisher Scientific,  
159 Waltham, MA, USA), followed by incubation at 37 °C for 30 min and then 80 °C for 15  
160 min to inactivate the enzyme. Single-base extension reactions were carried out in a 5.0  
161 μL final volume containing 0.5 μL SNaPshot Multiplex Ready Mix (Thermo Fisher  
162 Scientific), 1 μL primer mix (1.0 μM for each primer), and 2.0 μL of the treated PCR  
163 products. Reactions were performed in the Takara PCR Thermal Cycler (Takara) with  
164 25 cycles of denaturation at 96 °C for 10 s and annealing and elongation at 60 °C for 30  
165 s. The final extension products were treated with 1 U shrimp alkaline phosphatase  
166 (Thermo Fisher Scientific) and incubated at 37 °C for 1 h, followed by enzyme  
167 inactivation at 80 °C for 15 min. The PCR products (1.0 μL) were mixed with 0.2 μL  
168 GeneScan 120 LIZ size standard and 8 μL Hi-Di formamide prior to electrophoresis.  
169 Capillary electrophoresis was performed on the 3130xl genetic analyzer using POP-7  
170 (Thermo Fisher Scientific), and alleles were analyzed using GeneMaker v2.4.0 software  
171 (SoftGenetics, State College, PA, USA). For the other 43 SNP markers mapped to LG9,  
172 genotyping was performed using the 48.48 Dynamic Array (Fluidigm, South San  
173 Francisco, CA, USA). For the 48.48 Dynamic Array, 6.25 ng genomic DNA per sample  
174 (at a concentration of 5 ng/μL) were used for specific target amplification. The assays  
175 were performed following the protocol provided by the manufacturer. The data obtained

176 were analyzed using Fluidigm SNP Genotyping Analysis software (ver. 4.5.1). The  
177 primer information is provided in Table S2.

178 Chi-square tests were performed for each locus to assess the deviation from the  
179 expected Mendelian segregation ratio. Loci showing extreme segregation distortion ( $P <$   
180 0.01) and with many missing data points (more than five individuals) were excluded  
181 from further linkage analysis. The linkage analyses were performed using the maximum  
182 likelihood mapping algorithm in JoinMap ver. 4.1 software (Kyazma, Wageningen, The  
183 Netherlands) with a cross pollination-type population ( $hk \times hk$ ,  $lm \times ll$ , and  $nn \times np$ ) and  
184 two rounds of map calculation [27]. Markers were assigned to the LG9 linkage group  
185 using a logarithm of odds ratio threshold of 8.0, which was the same value as in  
186 previous reports on *C. japonica* [16, 17, 18, 26]. The maximum likelihood mapping  
187 algorithm was used to determine marker order in the linkage group. The map distance  
188 was calculated using the Kosambi mapping function [28]. Default settings were used for  
189 the recombination frequency threshold and ripple value.

190

### 191 **MAS of trees with *ms1***

192 Leaves for MAS selection were collected from breeding materials in Niigata  
193 (Tohoku breeding region), Yamagata (Tohoku breeding region), Miyagi (Tohoku  
194 breeding region), Shizuoka (Kanto breeding region), Tottori (Kansai breeding region),  
195 and Kumamoto (Kyushu breeding region) Prefectures with sample numbers of 238, 163,  
196 30, 34, 72, and 66, respectively. In the samples from Miyagi Prefecture, Kurihara-4, a  
197 tree heterozygous for *MS1*, was included. Genomic DNA was extracted from these  
198 needles using a modified CTAB method [25, 30]. In addition, we also performed MAS  
199 selection using previously extracted DNA from 47 *C. japonica* trees in the Ishinomaki  
200 natural population of Miyagi Prefecture, where clonal analysis was performed in 2017



201 [29].

202           Based on the sequence information of CJt020762, Hasegawa et al. [30]  
203 developed two primer pairs that sandwich the two deletions, respectively. These two  
204 markers were used for MAS selection in this study. PCR amplifications were performed  
205 in 10  $\mu$ L reaction volumes containing 5 ng of genomic DNA, 1 $\times$  PCR Kapa2G buffer  
206 with 1.5 mM MgCl<sub>2</sub>, 0.2  $\mu$ L of 25 mM MgCl<sub>2</sub>, 0.2  $\mu$ L of 10 mM each dNTP mix, 0.4  $\mu$ L  
207 of 5  $\mu$ M forward primers labeled with dye (CJt020762\_*ms1-1\_F* and  
208 CJt020762\_*ms1-2\_F*), 0.2  $\mu$ L 5  $\mu$ M reverse primers (CJt020762\_*ms1-1\_R* and  
209 CJt020762\_*ms1-2\_R*), 5 ng template DNA, and 0.5 U KAPA2G Fast PCR enzyme  
210 (KAPA2G Fast PCR kit; KAPA Biosystems, Wilmington, USA). Amplification was  
211 performed on the Takara PCR Thermal Cycler (Takara) under the following conditions:  
212 initial denaturation for 3 min at 95 °C, followed by 35 cycles of denaturation for 15 s at  
213 95 °C, annealing for 15 s at 60 °C, extension for 1 s at 72 °C, and a final extension for 1  
214 min at 72 °C. PCR products and the DNA size marker (LIZ600; Thermo Fisher  
215 Scientific) were separated by capillary electrophoresis on the ABI 3130 Genetic  
216 Analyzer (Applied Biosystems, Tokyo, Japan). DNA fragments were detected using  
217 GeneMarker software (ver. 2.4.0; SoftGenetics).

218

## 219 **Results and Discussion**

### 220 **Linkage maps of the *MS1* region**

221           Of the 130 S11-S progeny produced by artificial crossing between Shindai11  
222 and Suzu-2, 75 were male-fertile and 55 male-sterile. On the other hand, of the 138  
223 S12-S progeny produced by artificial crossing between Shindai12 and Suzu-2, 65 were  
224 male-fertile and 73 male-sterile. The segregation ratio between male-sterile and  
225 male-fertile trees in S11-S and S12-S progenies did not deviate significantly from the

226 expected ratios of 1:1 ( $X^2 = 0.31$  [ $P = 0.08$ ] and 0.46 [ $P = 0.50$ ], respectively). These  
227 results clearly suggested that the male-sterile gene of Shindai11 and Shindai12 was *MSI*.  
228 Based on observations using a microscope, Miura et al. [31] reported that the  
229 male-sterile phenotype of Shindai11 and Shindai12 was similar to those of Fukushima1,  
230 Fukushima2, and Shindai3, which are regulated by the *MSI* gene [6, 7]. These previous  
231 observational results obtained by microscopy are consistent with the results in this  
232 study.

233 The 19 and 18 markers were mapped onto the partial linkage maps of the  
234 region encompassing *MSI* for the S11-S and S12-S families, respectively (Fig. 1). There  
235 was collinearity (conserved gene order) among the two partial linkage maps. Two  
236 markers (CJt020762\_*msI-1* and reCj19250\_2335) were mapped to the same position as  
237 the *MSI* locus in both maps. Of these markers, reCj19250\_2335 could not be used to  
238 predict trees with *msI* with 100% accuracy [21]. Therefore, we used CJt020762 for  
239 MAS in this study. As genome sequencing has now been conducted in *C. japonica*, the  
240 question of whether these markers are located close to each other within the genome  
241 will probably be investigated in the near future.

242

### 243 **MAS of trees with *msI***

244 In the MAS results of this study, we found that five trees in Niigata Prefecture  
245 (Kashiwazakishi-1, Setsugai Niigata-6, Setsugai Murakami-2, Setsugai Aikawa-8, and  
246 Kamikiri Niigata-55) and one tree in Yamagata Prefecture (Taisetsu Yamagata-8) had  
247 heterozygous *msI-1*, and three trees in Miyagi Prefecture (Kurihara-4 and two trees in  
248 the natural population) had heterozygous *msI-2*. Two male-sterile trees in Niigata  
249 Prefecture (Shindai11 and Shinadai-12) used as mother trees of mapping families had  
250 homozygous *msI-1*. The two trees with *msI-2* in the Ishinomaki natural forest

251 (Ishinomaki\_J284 and Ishinomaki\_J278) were considered to have a parent–child  
252 relationship according to their genotypes. Hasegawa et al. [24] reported that trees with  
253 *msl-2* may be distributed at a high frequency in this forest. Our results strongly support  
254 this suggestion. Through further selections from this natural forest, it may be possible to  
255 obtain more breeding materials for male sterility.

256         Because half of the offspring in the mapping family Fukushima1  
257 (*msl-1/msl-1*) × Ooi-7 (*msl-2/Ms1*) [21] showed male sterility, both of the trees with  
258 *msl-1* and *msl-2* can be used in a breeding program. Therefore, MAS should target both  
259 the *msl-1* and *msl-2* alleles. In this study, although we performed MAS in several  
260 prefectures of Japan, the prefectures in which we found trees with *msl-1* or *msl-2* were  
261 restricted (all trees with *msl* were found in the Tohoku breeding region; Fig. 2). Our  
262 results suggested that there may be geographical hotspots for *msl-1* and *msl-2* in  
263 Niigata Prefecture and Miyagi Prefecture, respectively. Among the four breeding  
264 regions that use *C. japonica* for their artificial forests, the Tohoku breeding region has a  
265 relatively large amount of breeding materials for male sterility. However, the breeding  
266 materials for male sterility in the Kanto and Kansai breeding regions are still fewer than  
267 those in the Tohoku breeding region, and there are no breeding materials for male  
268 sterility in the Kyushu breeding region.

269         It took approximately 5 years to achieve precise selection of trees heterozygous  
270 for *MSI* using a magnifying glass or a microscope (1 year to promote flowering, 1 year  
271 for seed production, and 3 years to confirm male sterility). Because MAS is effective for  
272 reducing the labor and time required for selection of trees with the male-sterile gene, the  
273 number of breeding materials should increase in the future.

274

275 **Conclusions**

276 In this study, we performed MAS for 650 trees from six prefectures of Japan  
277 using CJt020762\_*msI-1* markers and found that five trees in Niigata Prefecture  
278 (Kashiwazakishi-1, Setsugai Niigata-6, Setsugai Murakami-2, Setsugai Aikawa-8, and  
279 Kamikiri Niigata-55) and one tree in Yamagata Prefecture (Taisetsu Yamagata-8) had  
280 heterozygous *msI-1*, and three trees in Miyagi Prefecture (Kurihara-4 and two trees in  
281 the natural population) had heterozygous *msI-2*. The results obtained in this study  
282 suggested that there may be geographical hotspots for the *msI-1* and *msI-2* alleles,  
283 respectively. Because MAS can effectively reduce the labor and time for selection of  
284 trees with the male-sterile gene, the number of breeding materials should increase in the  
285 future.

286

## 287 **Acknowledgements**

288 The authors would like to thank Y. Abe, Y. Komatsu for assistance with laboratory  
289 works. We also thank Y. Sato for artificial crossing. We also thank Y. Ito, S. Ikemoto, M.  
290 Sonoda, K. Yokoo, T. Hakamata and T. Miyashita for providing samples.

291

292 **Supplementary Materials:** The following are available online at XXX,  
293 Table S1: Primer sequence of SNaPshot assay, Table S2: Primer sequence for a 48.48  
294 Dynamic Array.

295

296 **Author Contributions:** Conceptualization, Y.H., S.U., S.H. and Y.M.; Material  
297 preparation and phenotype data curation, T.T., S.H., J.I., Y.K. and Y.M.; Marker  
298 development and genotype data collection, S.U., Y.H., T.T., M.W., R.S. and Y.M.;  
299 Funding acquisition, Y.M.; Writing-original draft, Y.M.; Writing-review and editing,  
300 Y.H., S.U., M.W. and T.T. All authors have read and agreed to the published version of

301 the manuscript.

302

303 **Funding:** This research was supported by the grants from Ministry of Agriculture,  
304 Forestry and Fisheries of Japan (MAFF) and NARO Bio-oriented Technology Research  
305 Advancement Institution (BRAIN) (the Science and technology research promotion  
306 program for agriculture, forestry, fisheries and food industry (No.28013B)) and the  
307 grants from NARO Bio-oriented Technology Research Advancement Institution  
308 (BRAIN) (Research program on development of innovative technology (No.28013BC)).

309

310 **Conflicts of Interest:** The authors declare no conflict of interest.

311

## 312 **References**

- 313 1. Neale, D.B.; Kremer, A. Forest tree genomics: growing resources and applications.  
314 *Nat. Rev.* **2011**, *12*, 111–122.
- 315 2. Forestry Agency. Statistical Handbook of Forest and Forestry. *Forestry Agency,*  
316 *Ministry of Agriculture, Forestry and Fisheries* **2014**, 8–9. (in Japanese)
- 317 3. Baba, K.; Nakae, K. The national epidemiological survey of nasal allergy 2008  
318 (compared with 1998) in otolaryngologists and their family members. *Prog. Med.*  
319 **2008**, *28*, 2001–2012. (in Japanese)
- 320 4. Taira, H.; Teranishi, H.; Kenda, Y. A case study of male sterility in sugi  
321 (*Cryptomeria japonica*). *J. Jpn. For. Soc.* **1993**, *75*, 377–379. (in Japanese with  
322 English summary).
- 323 5. Taira, H.; Saito, M.; Furuta, Y. Inheritance of the trait of male sterility in  
324 *Cryptomeria japonica*. *J. For. Res.* **1999**, *4*, 271–273.
- 325 6. Saito, M. Breeding strategy for the pollinosis preventive cultivars of *Cryptomeria*

- 326 *japonica* D Don. *J. Jpn. For. Soc.* **2010**, 92, 316–323. (in Japanese with English  
327 summary).
- 328 7. Igarashi, M.; Watanabe, J.; Ozawa, H.; Saito, Y.; Taira, H. The male sterile sugi  
329 (*Cryptomeria japonica* D. Don) was found in Fukushima Prefecture (I): Selection of  
330 the search ground and identification of the male sterility. *Tohoku J. For. Sci.* **2004**, 9,  
331 86–89. (in Japanese with English abstract)
- 332 8. Takahashi, M.; Iwaizumi, M.G.; Hoshi, H.; Kubota, M.; Fukuda, Y.; Fukatsu, E.;  
333 Kondo, T. Survey of male sterility on sugi (*Cryptomeria japonica* D. Don) clones  
334 collected from Kanto Breeding Region and characteristics of two male-sterile clones.  
335 *Bull. Natl. For. Tree Breed. Cent.* **2007**, 23, 11–36. (in Japanese with English  
336 abstract).
- 337 9. Fujisawa, T.; Saito, H.; Fujimiya, T.; Taira, H.; Saito, M. Selection and practical  
338 application of male-fertile cedar from elite trees in Kanagawa prefecture.  
339 Proceedings of the 120th Japanese Forest Society Meeting, Kyoto, Japan, **2008**;  
340 Pb01-06. (in Japanese)
- 341 10. Ueuma, H.; Yoshii, E.; Hosoo, Y.; Taira, H. Cytological study of a male-sterile  
342 *Cryptomeria japonica* that does not release microspores from tetrads. *J. For. Res.*  
343 **2009**, 14, 123–126.
- 344 11. Yamada, H.; Yamaguchi, K. Survey of male sterility of sugi (*Cryptomeria japonica*  
345 D. Don) clones collected from Kansai Breeding Region and characteristics of the  
346 male-sterile clone. *Appl. For. Sci.* **2009**, 8, 33–36. (in Japanese)
- 347 12. Kawai, K.; Kubota, M.; Endo, K.; Isoda, K. Trial of efficient method for screening  
348 *Cryptomeria japonica* trees heterozygous for male-sterile gene by segregation of  
349 male-sterile seedlings derived from self-pollinated progeny. *Bull. FFPRI*, **2017**, 444,  
350 265-266 (in Japanese).

- 351 13. Yoshii, E.; Taira, H. Cytological and genetical studies on male sterile sugi  
352 (*Cryptomeria japonica* D. Don), Shindai 1 and Shindai 5. *J. Jpn. For. Soc.* **2007**, 89,  
353 26-30. (in Japanese with English summary).
- 354 14. Miyajima, D.; Yoshii, E.; Hosoo, Y.; Taira, H. Cytological and genetic studies on  
355 male sterility in *Cryptomeria japonica* D. Don (Shindai 8). *J. Jpn. For. Soc.* **2010**,  
356 92, 106-109. (in Japanese with English summary)
- 357 15. Saito, M.; Taira, H.; Furuta, Y. Cytological and genetical studies on male sterility in  
358 *Cryptomeria japonica* D. Don. *J. For. Res.* **1998**, 3, 167–173.
- 359 16. Moriguchi, Y.; Ujino-Ihara, T.; Uchiyama, K.; Futamura, N.; Saito, M.; Ueno, S.;  
360 Matsumoto, A.; Tani, N.; Taira, H.; Shinohara, K.; Tsumura, Y. The construction of a  
361 high-density linkage map for identifying SNP markers that are tightly linked to a  
362 nuclear-recessive major gene for male sterility in *Cryptomeria japonica* D. Don.  
363 *BMC Genomics* **2012**, 13, 95.
- 364 17. Moriguchi, Y.; Ueno, S.; Higuchi, Y.; Miyajima, D.; Ito, S.; Futamura, N.;  
365 Shinohara, K.; Tsumura, Y. Establishment of a microsatellite panel covering the sugi  
366 (*Cryptomeria japonica*) genome, and its application for localization of a male sterile  
367 gene (*ms-2*). *Mol. Breed.* **2014**, 33, 315–325.
- 368 18. Moriguchi, Y.; Uchiyama, K.; Ueno, S.; Ujino-Ihara, T.; Matsumoto, A.; Iwai, J.;  
369 Miyajima, D.; Saito, M.; Sato, M.; Tsumura, Y. A high-density linkage map with  
370 2,560 markers and its application for the localization of the male-sterile genes *ms3*  
371 and *ms4* in *Cryptomeria japonica* D. Don. *Tree Genet. Genomes* **2016**, 12, 57.
- 372 19. Isoda, K.; Kawai, K.; Yamaguchi, K.; Kubota, M.; Yamada, H. Screening of trees  
373 heterozygous for male-sterile gene in Kansai breeding region. *Ann. Rep. Tree Breed.*  
374 *Cent. 2013*, **2013**, 55–59.
- 375 20. Saito, M.; Aiura, H.; Kato, A.; Matsuura, T. Characterization of the cutting cultivar

- 376 of *Cryptomeria japonica* D. Don, Zasshunbo, with a heterozygous male-sterility  
377 gene in a heterozygous state, selected from Toyama Prefecture, Japan. *For. Genet.*  
378 *Tree Breed.* **2015**, 4, 45–51. (in Japanese with English abstract)
- 379 21. Hasegawa, Y.; Ueno, S.; Matsumoto, A.; Ujino-Ihara, T.; Uchiyama, K.; Totsuka, S.;  
380 Iwai, J.; Hakamata, T.; Moriguchi, Y. Fine mapping of the male-sterile genes (*MS1*,  
381 *MS2*, *MS3*, and *MS4*) and development of SNP markers for marker-assisted  
382 selection in Japanese cedar (*Cryptomeria japonica* D. Don). *PLoS ONE* **2018**, 13,  
383 e0206695.
- 384 22. Mishima, K.; Hirao, T.; Tsubomura, M.; Tamura, M.; Kurita, M.; Nose, M.;  
385 Hanaoka, S.; Takahashi, M.; Watanabe, A. Identification of novel putative causative  
386 genes and genetic marker for male sterility in Japanese cedar (*Cryptomeria japonica*  
387 D. Don). *BMC Genomics.* **2018**, 19, 277.
- 388 23. Ueno, S.; Uchiyama, K.; Moriguchi, Y.; Ujino-Ihara, T.; Matsumoto, A.; Fu-Jin, W.;  
389 Saito, M.; Higuchi, Y.; Futamura, N.; Kanamori, H.; Katayose, Y.; Tsumura, Y.  
390 Scanning RNA-Seq and RAD-Seq approach to develop SNP markers closely linked  
391 to *MALE STERILITY 1 (MS1)* in *Cryptomeria japonica* D. Don. *Breed. Sci.* **2019**, 69,  
392 19–29.
- 393 24. Hasegawa, Y.; Ueno, S.; Fu-Jin, W.; Matsumoto, A.; Uchiyama, K.; Ujino-Ihara, T.;  
394 Hakamata, T.; Fujino, T.; Kasahara, M.; Bino, T.; Yamaguchi, K.; Shigenobu, S.;  
395 Tsumura, Y.; Moriguchi, Y. Identification and genetic diversity analysis of a  
396 male-sterile gene (*MS1*) in Japanese cedar (*Cryptomeria japonica* D. Don). *Scient.*  
397 *Rep.* **2020a**, (under review, doi: <https://doi.org/10.1101/2020.05.09.085464>).
- 398 25. Murray, M.; Thompson, W.F. Rapid isolation of high molecular weight plant DNA.  
399 *Nucleic Acids Res.* **1980**, 8, 4321–4325.
- 400 26. Moriguchi, Y.; Ueno, S.; Saito, M.; Higuchi, Y.; Miyajima, D.; Itoo, S.; Tsumura, Y.



- 401 A simple allele-specific PCR marker for identifying male-sterile trees: Towards  
402 DNA marker-assisted selection *Cryptomeria japonica* breeding program. *Tree Genet.*  
403 *Genomes* **2014b**, 10, 1069–1077.
- 404 27. Van Ooijen, J.W.; Voorrips, R.E. JoinMap version 3.0, software for the calculation  
405 of genetic linkage maps. *Plant Res. Int.*, Wageningen, **2001**.
- 406 28. Kosambi, D.D. The estimation of map distances from recombination values. *Ann.*  
407 *Eugen.* **1944**, 12, 172–175.
- 408 29. Doğan, G.; Tadama, T.; Kohama, H.; Matsumoto, A.; Moriguchi, Y. Evidence of  
409 clonal propagation in *Cryptomeria japonica* D. Don distributed on Pacific Ocean  
410 side in Japan. *Silvae Genet.* **2017**, 66, 43–46.
- 411 30. Hasegawa, Y.; Ueno, S.; Fu-Jin, W.; Matsumoto, A.; Ujino-Ihara, T.; Uchiyama, K.;  
412 Moriguchi, Y.; Kasahara, M.; Fujino, T.; Shigenobu, S.; Yamaguchi, K.; Bino, T.;  
413 Hakamata, T. Development of diagnostic PCR and LAMP markers for *MALE*  
414 *STERILITY 1 (MSI)* in *Cryptomeria japonica* D Don. *BMC Res. Note* **2020b**, (under  
415 review, doi: <https://doi.org/10.1101/2020.05.19.090092>).
- 416 31. Miura, S.; Nameta, M.; Yamamoto, T.; Igarashi, M.; Taira, H. Mechanisms of male  
417 sterility in four *Cryptomeria japonica* individuals with obvious visible abnormality  
418 at the tetrad stage. *J. Jpn. For. Soc.* **2011**, 93, 1–7. (in Japanese with English  
419 summary)

420

## 421 **Figure legends**

422 Figure 1. Partial linkage maps of the region encompassing *MSI* in the S11-S and S12-S  
423 *C. japonica* families.

424 Figure 2. Breeding materials with *MALE STERILITY 1* of *C. japonica* in four breeding  
425 regions. The bold font shows the selected trees in this study.

1

1

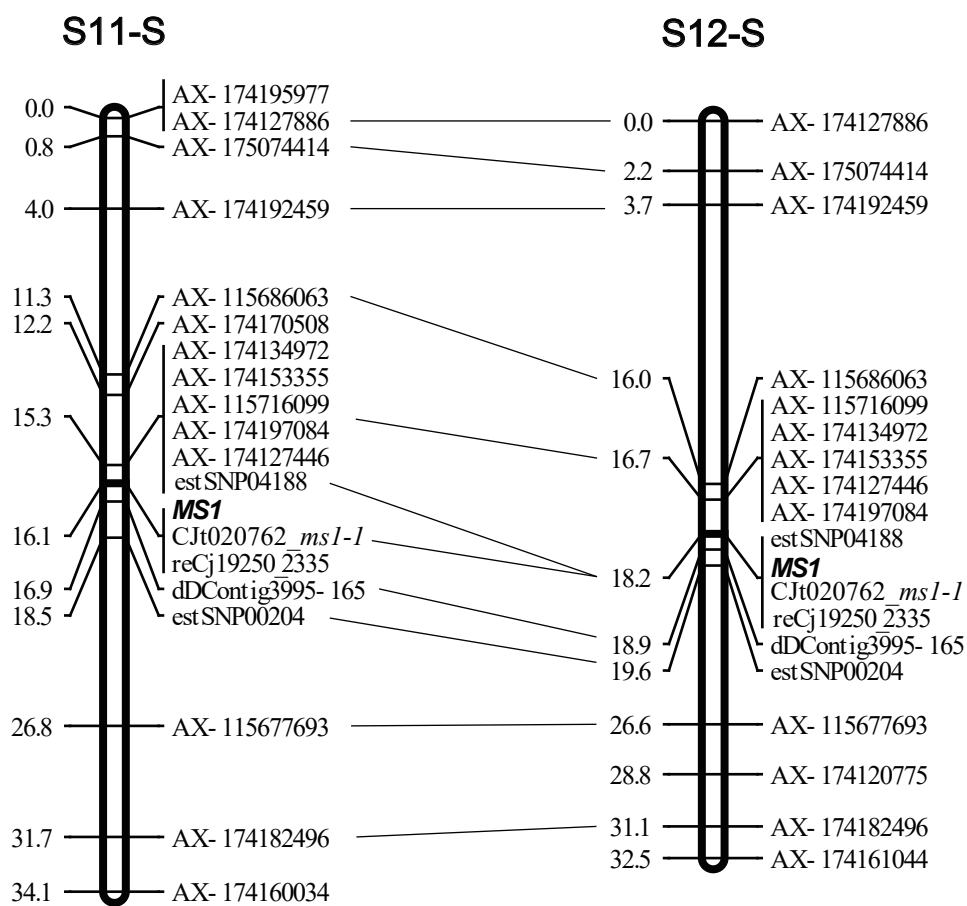

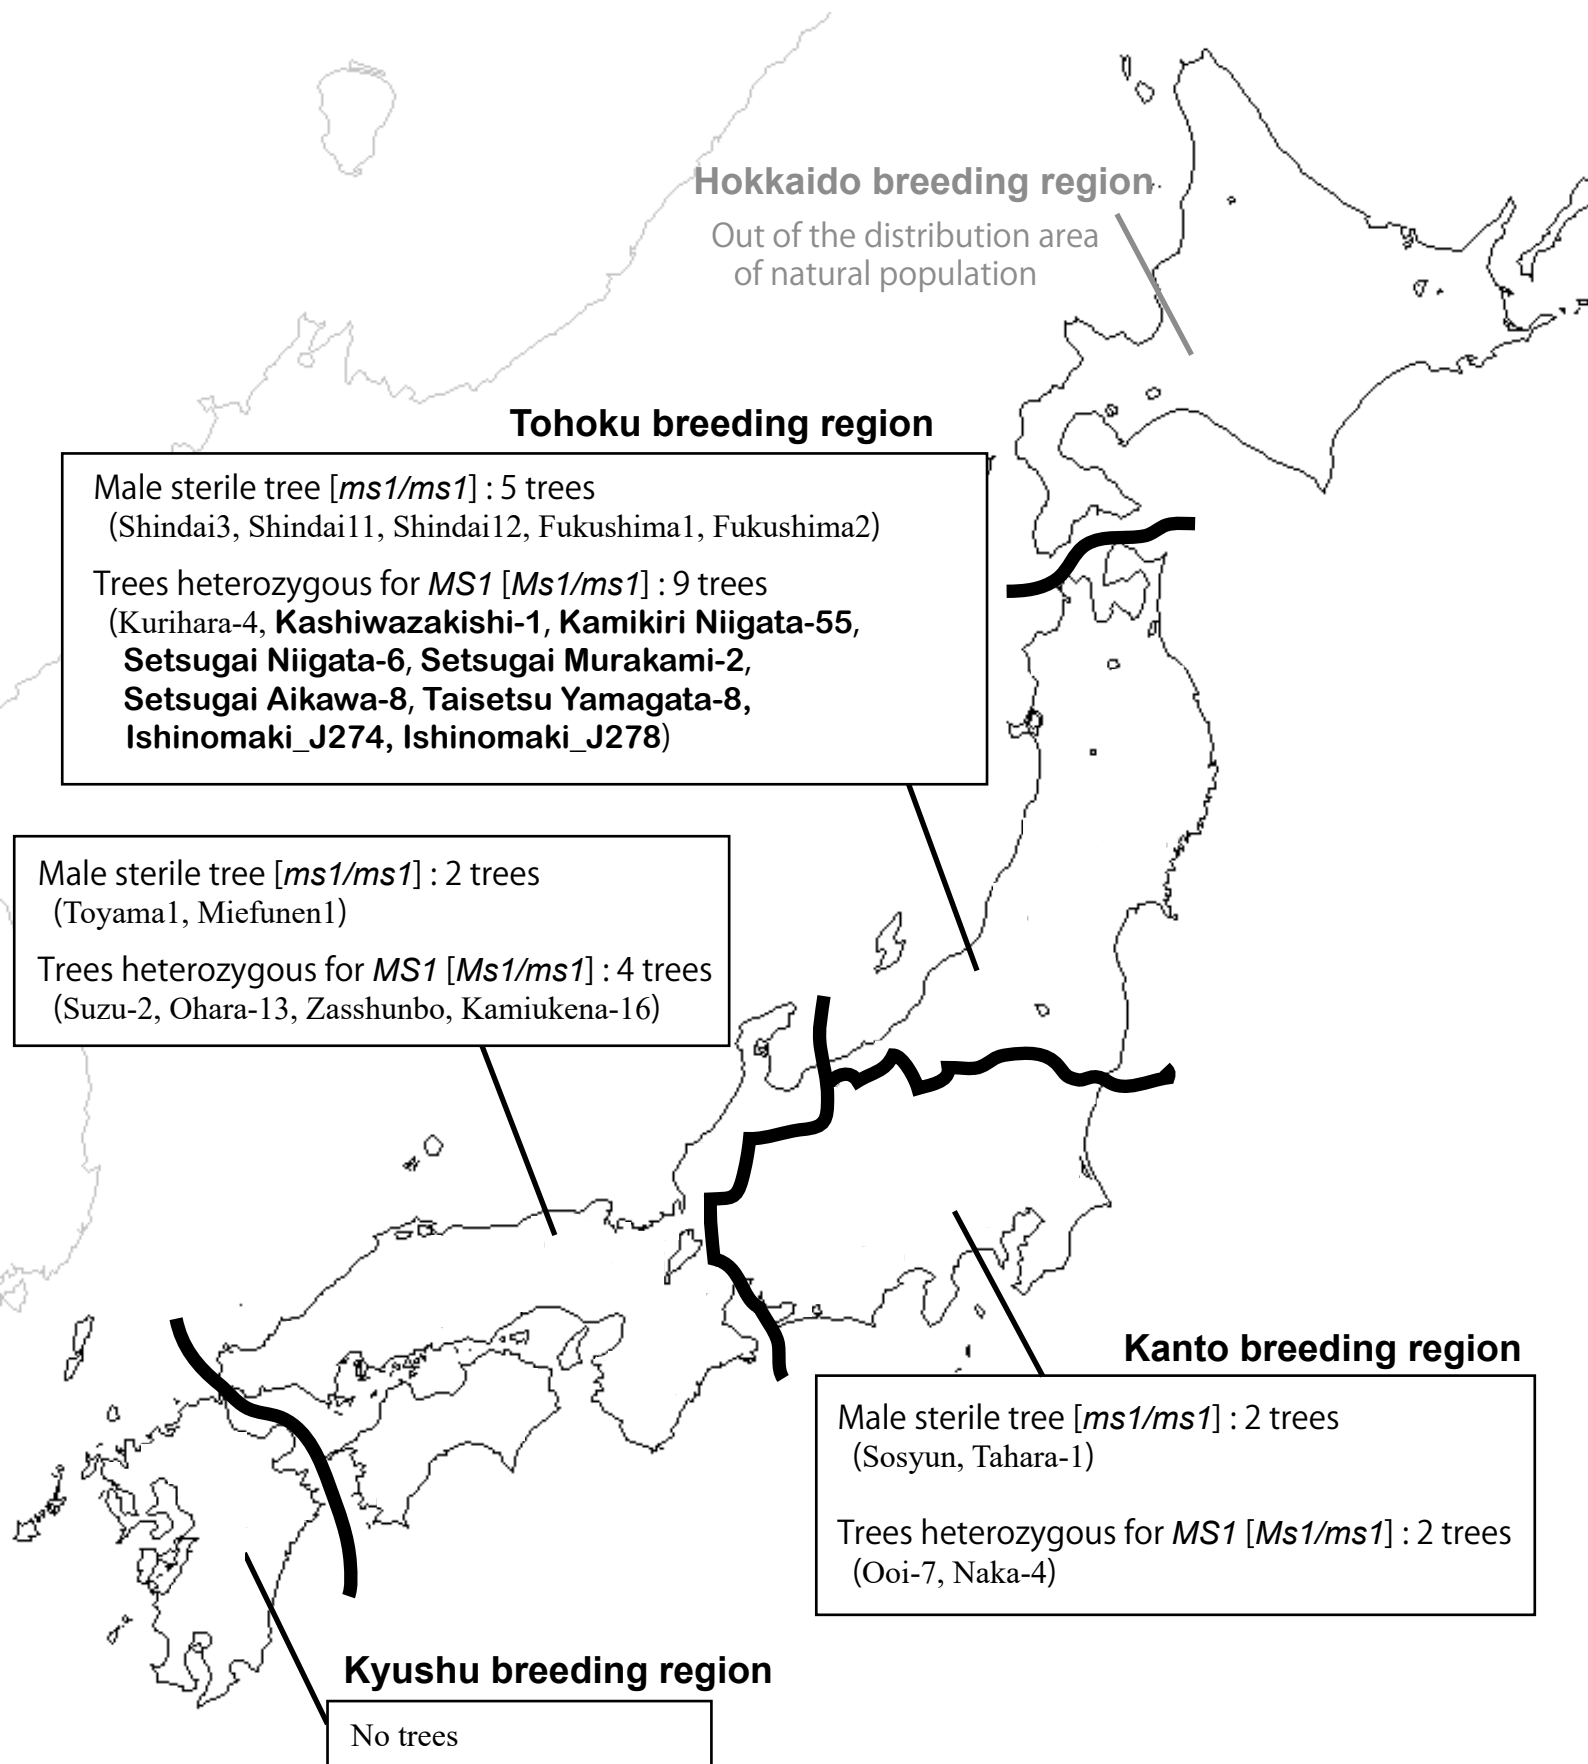

Source: https://www.biorxiv.org/content/10.1101/2020.05.29.114140v1.full.pdf
